# Supplementary material for: Mechanically robust triboelectric nanogenerator with a shear thickening fluid for impact monitoring
Source: Royal Society of Chemistry journal article supplement (doi:10.1039/d2ta01209j), 2022-01-01
Supplement: d2ta01209j1.pdf [file d2ta01209j1.pdf]

## Supplementary Information

# Mechanically robust triboelectric nanogenerator with shear thickening fluid for impact monitoring

*Seong-Yun Yun,<sup>a</sup> Il-Woong Tcho,<sup>a</sup> Weon-Guk Kim,<sup>a</sup> Do-Wan Kim,<sup>a</sup> Joon-Ha Son,<sup>a</sup> Sang-Won  
Lee,<sup>a</sup> and Yang-Kyu Choi<sup>\*a</sup>*

<sup>a</sup> School of Electrical Engineering, Korea Advanced Institute of Science and Technology  
(KAIST), 291 Daehak-ro, Yuseong-gu, Daejeon 34141, Republic of Korea

\* Address correspondence to [ykchoi@ee.kaist.ac.kr](mailto:ykchoi@ee.kaist.ac.kr)

**1. 3D-printed molds for manufacturing of STF-TENG and used objects for evaluation of both impact-absorbing property and mechanical robustness of STF-TENG**

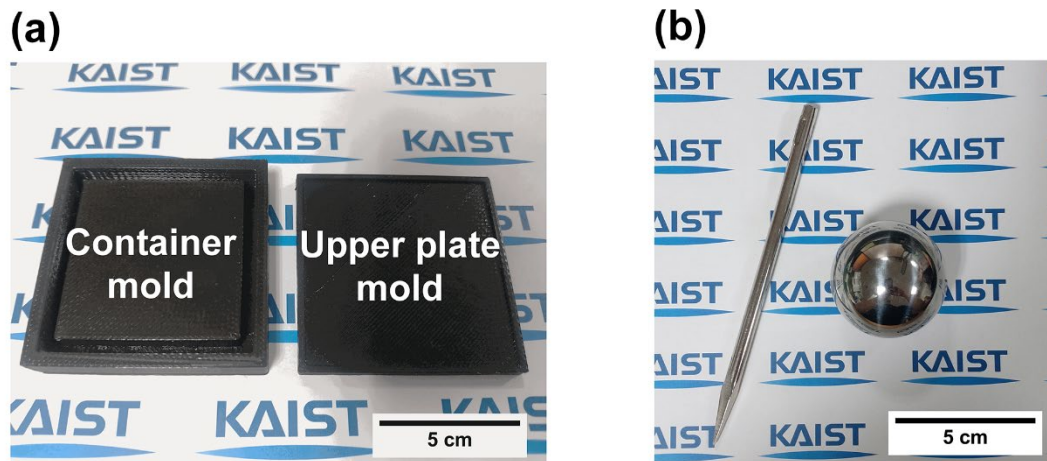

**Figure S1.** (a) Optical photograph of the 3D-printed molds for manufacturing of STF-TENG. Left image is the 3D-printed mold for manufacturing a container. Right image is 3D-printed mold for manufacturing an upper plate served as a lid. (b) Optical photograph of the metal ball for evaluation of impact-absorbing property and the pointed gimlet for assessment of mechanical robustness. All scale bars are 5 cm.

## 2. Resistance measurement of the STF

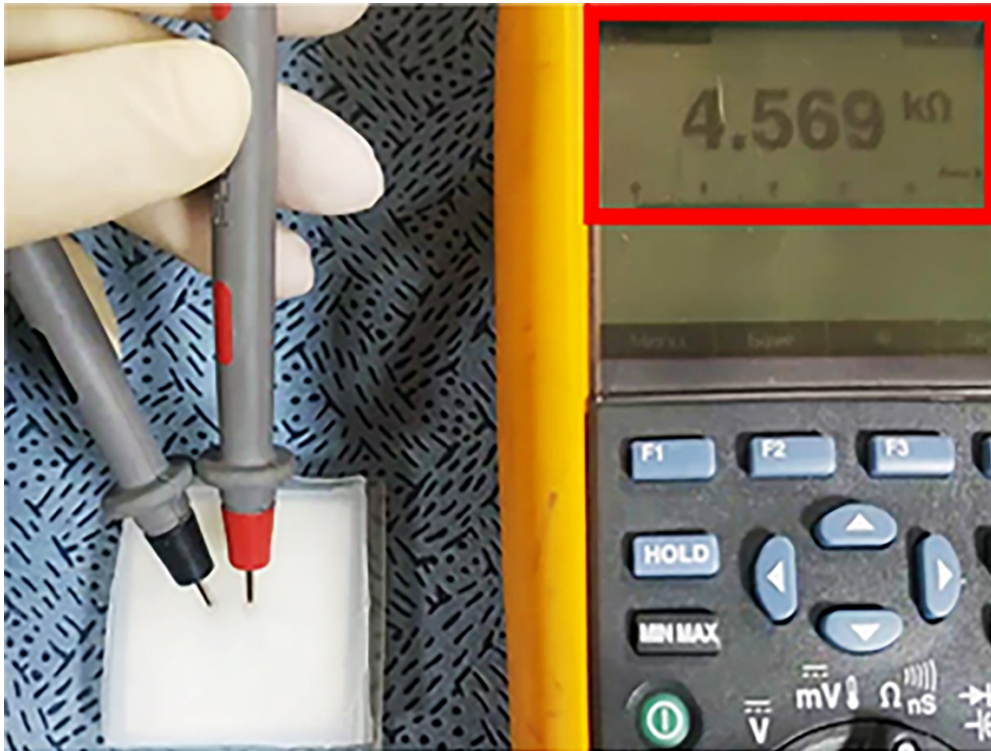

**Figure S2.** Resistance of the shear thickening fluid.

### 3. Particle size distribution of corn starch and SEM image of NaCl

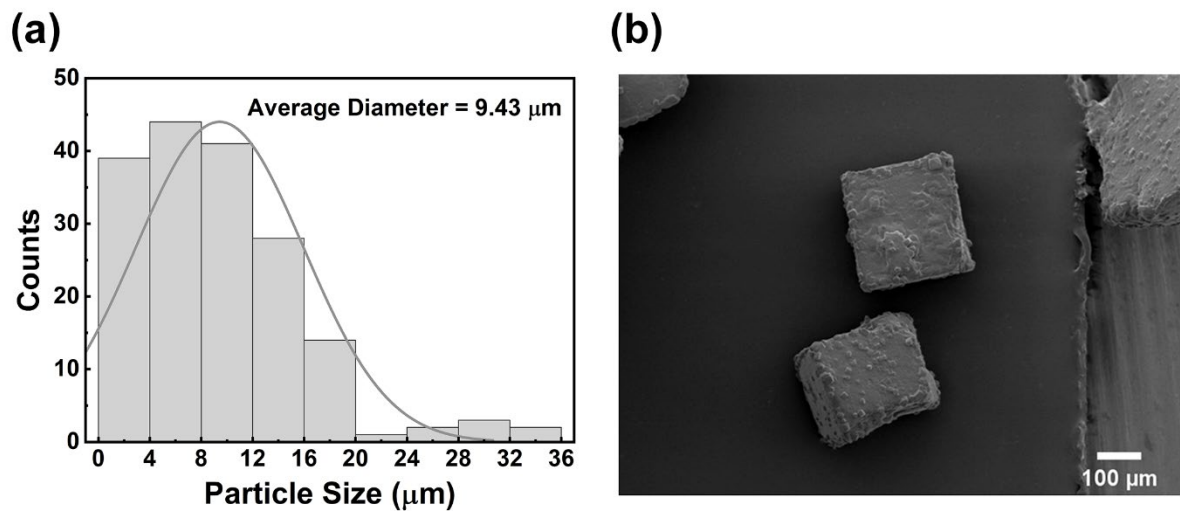

**Figure S3.** (a) Particle size distribution of the corn starch. (b) SEM image of NaCl. A scale bar is 100  $\mu\text{m}$ .

#### 4. Experimental setup for measurement of electrical output performance and contact force

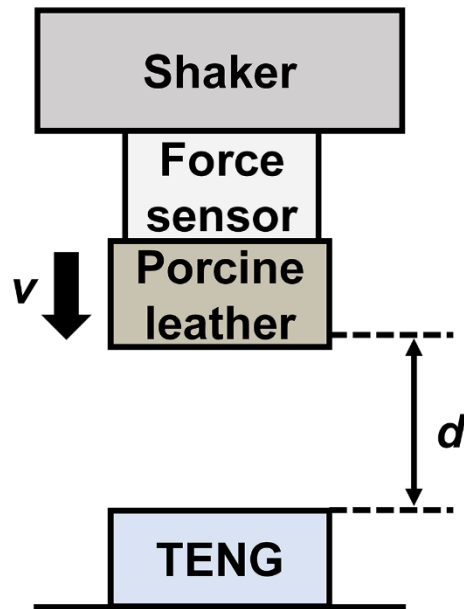

**Figure S4.** Experimental setup for the measurement of the electrical output performance and the contact force of the S-TENG, the L-TENG, and the STF-TENG.

## 5. Comparison of transferred charge density among S-TENG, L-TENG, and STF-TENG

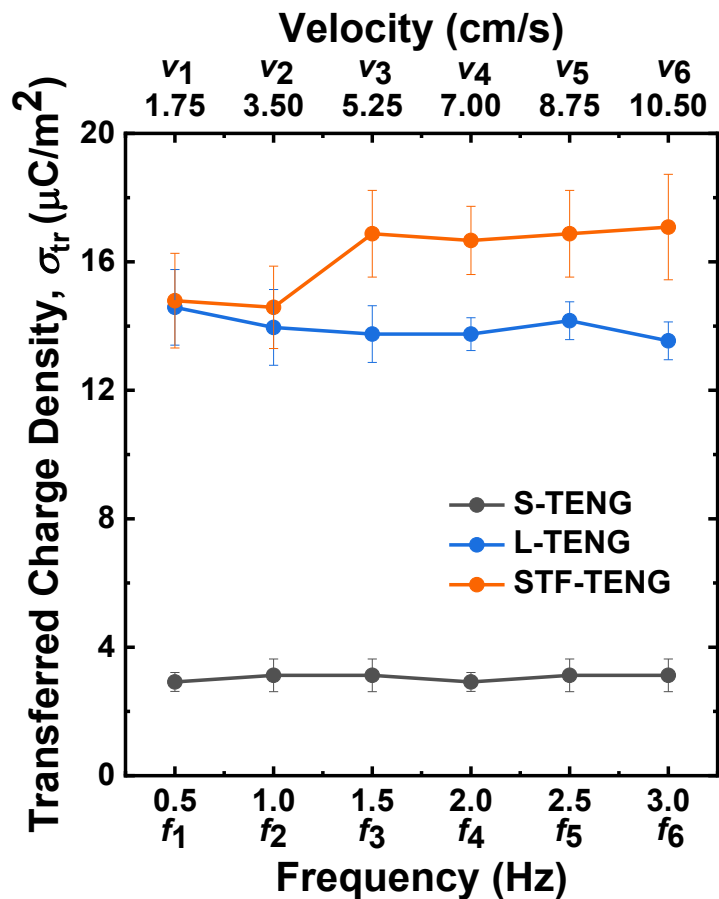

**Figure S5.** Comparison of transferred charge density ( $\sigma_{tr}$ ) among the S-TENG, the L-TENG, and the STF-TENG for various contact velocities.

## 6. Electrical output performances of S-TENG, L-TENG, and STF-TENG

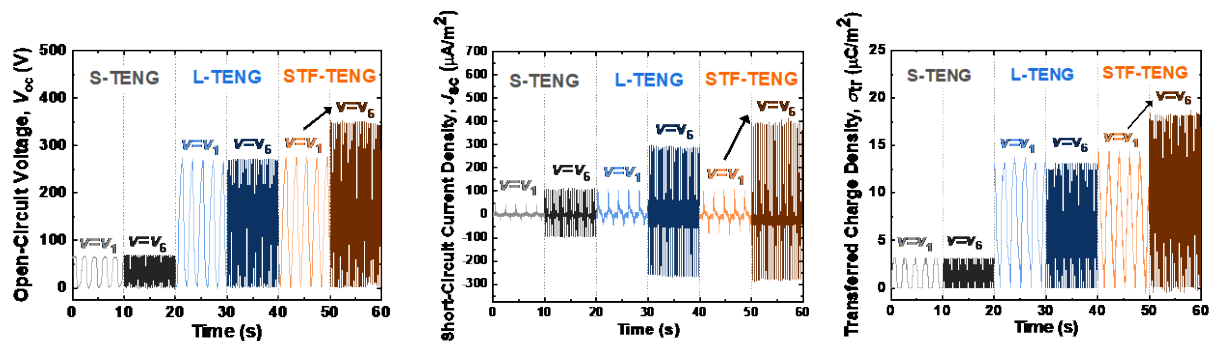

**Figure S6.** Waveforms of three electrical output performances for S-TENG, L-TENG, and STF-TENG at  $v_1$  and  $v_6$  (a)  $V_{oc}$ , (b)  $J_{sc}$ , (c)  $\sigma_{tr}$ .

## 7. Measured impact force on flat surface

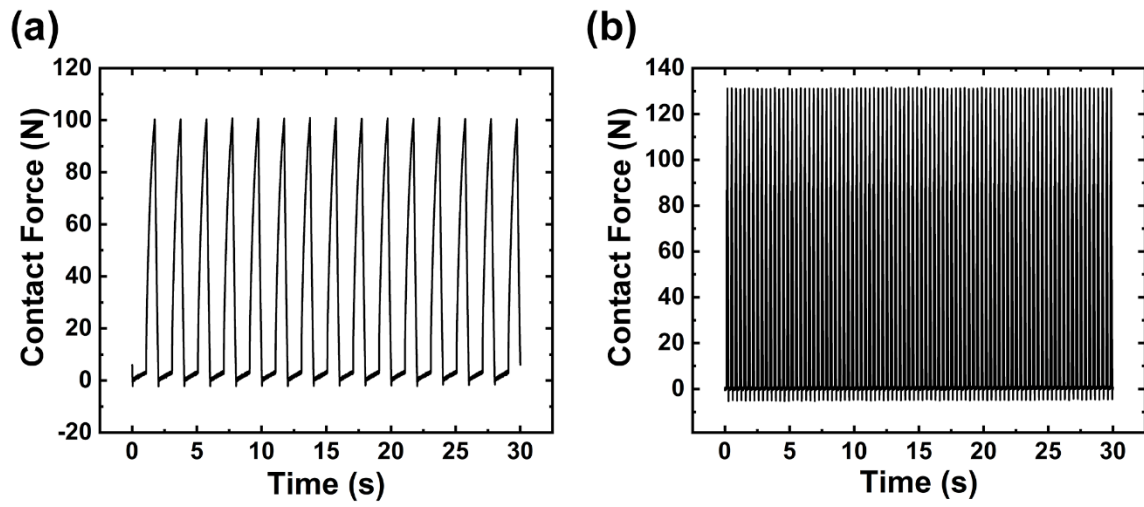

**Figure S7.** Measured impact force (contact force) on flat surface. (a) Contact force at  $v_1$ . (b) Contact force at  $v_6$ .



## 8. Comparison of peak power density among S-TENG, L-TENG, and STF-TENG

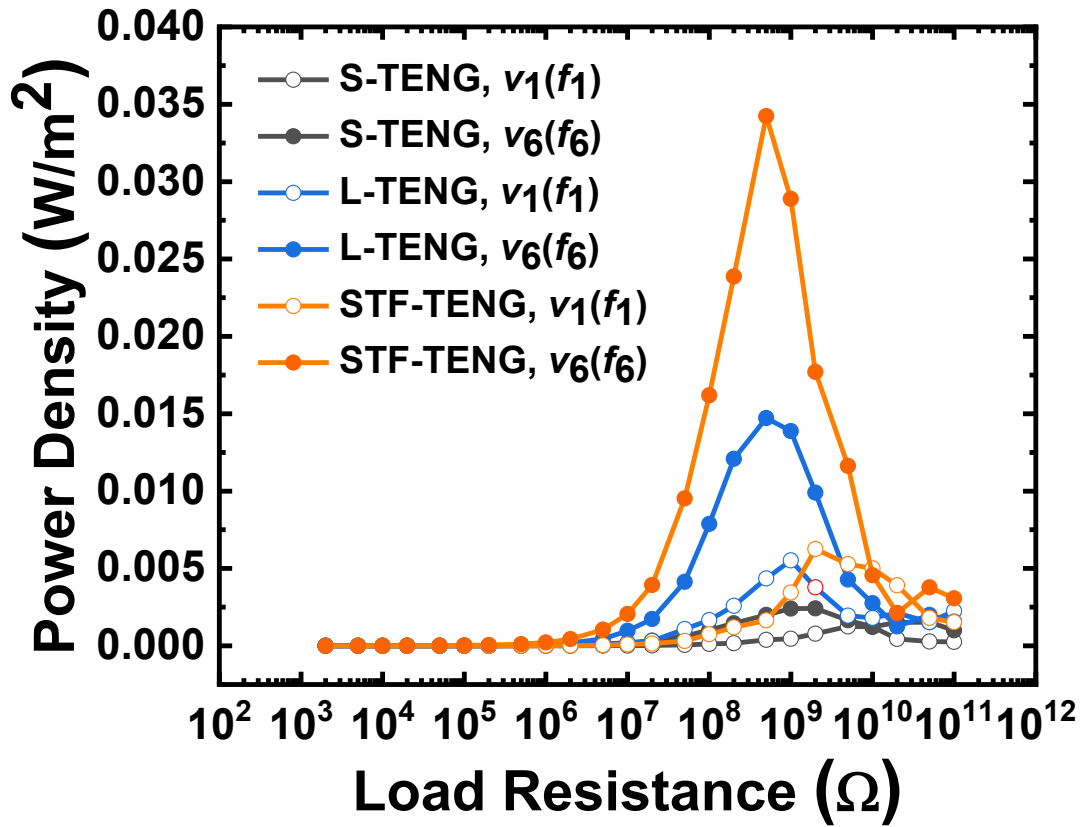

**Figure S8.** Comparison of extracted peak power density from the S-TENG, the L-TENG, and the STF-TENG at  $v_1$  and  $v_6$ .

## 9. Demonstration of STF-TENG as a power source to drive LEDs

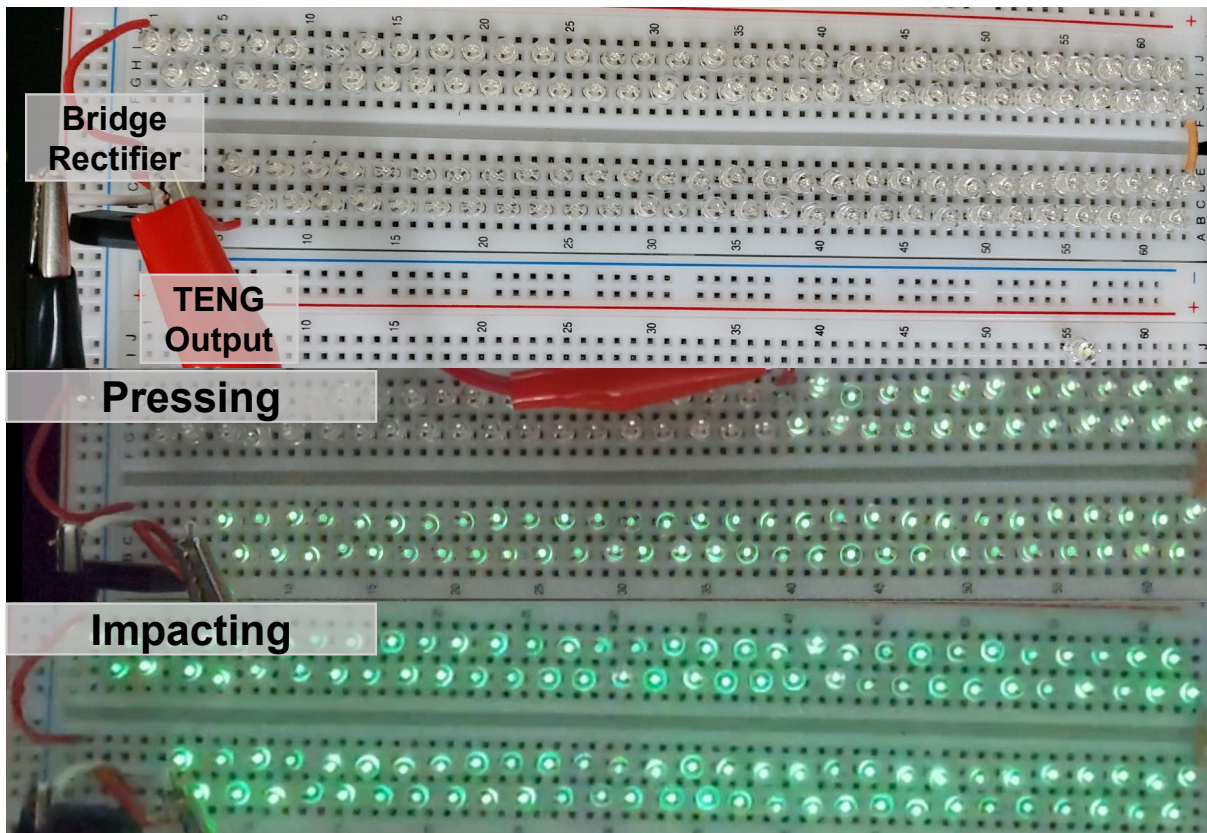

**Figure S9.** Optical photographs to light up LEDs by power generated from the STF-TENG.

Whereas 80 LEDs were turned on by pressing, 119 LEDs were turned on by impacting.

## 10. Experimental setup for measurement of impact force

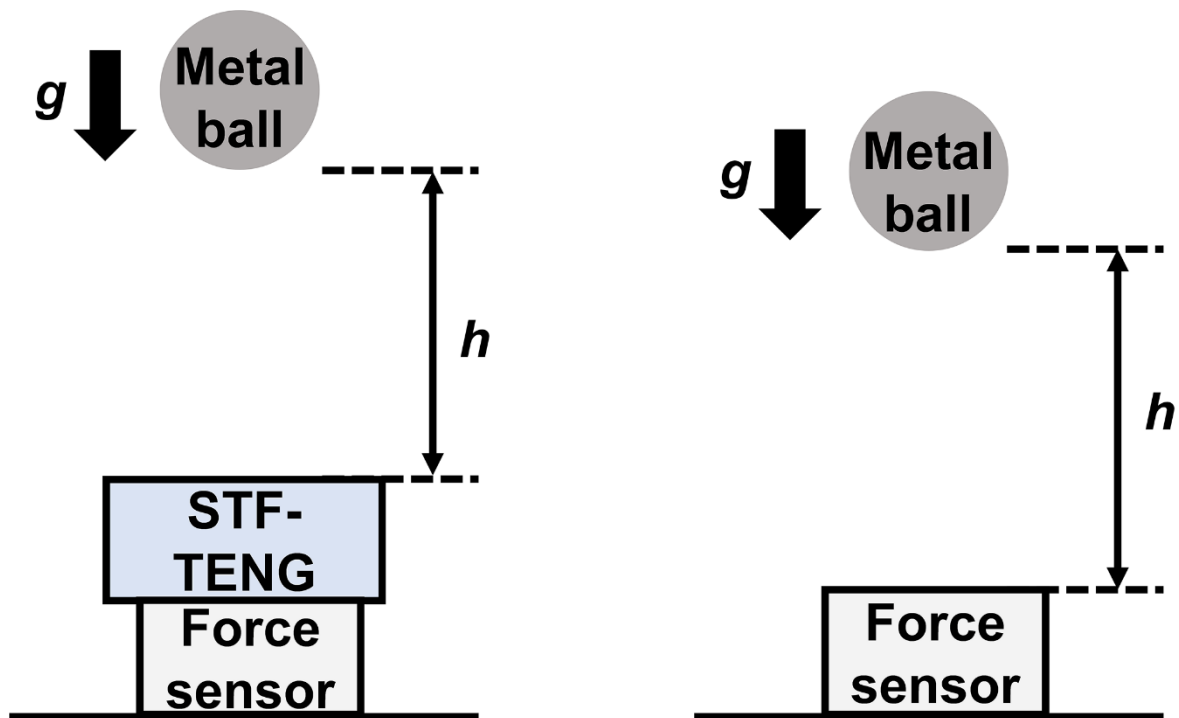

**Figure S10.** Experimental setup for measurement of impact force by a free-falling metal ball with a height of  $h$  above the STF-TENG (left) and above the force sensor (right), respectively.

## 11. Characterization of impact-absorbing property

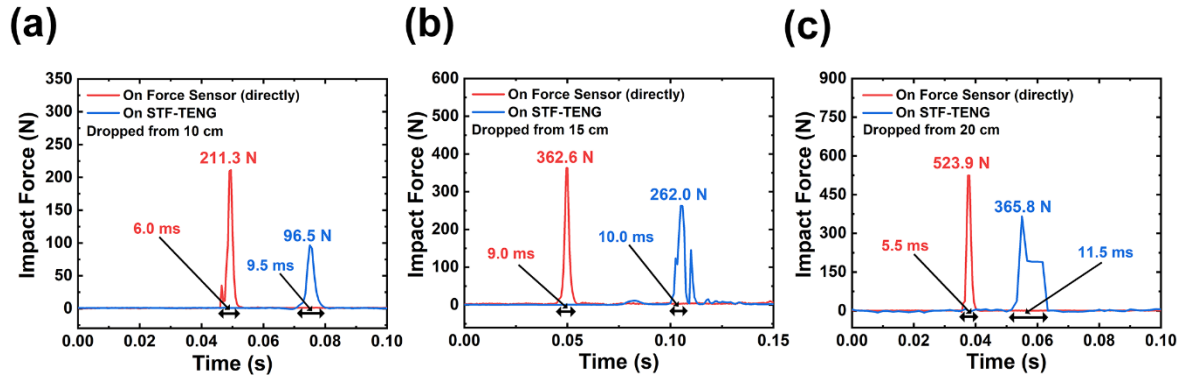

**Figure S11.** Comparison of impact forces between on the STF-TENG and directly on the force sensor for various  $h$ . (a) Compared impact forces at  $h=10$  cm. (b) Compared impact forces at  $h=15$  cm. (c) Compared impact forces at  $h=20$  cm.

## 12. Output current density generated by dropping metal ball

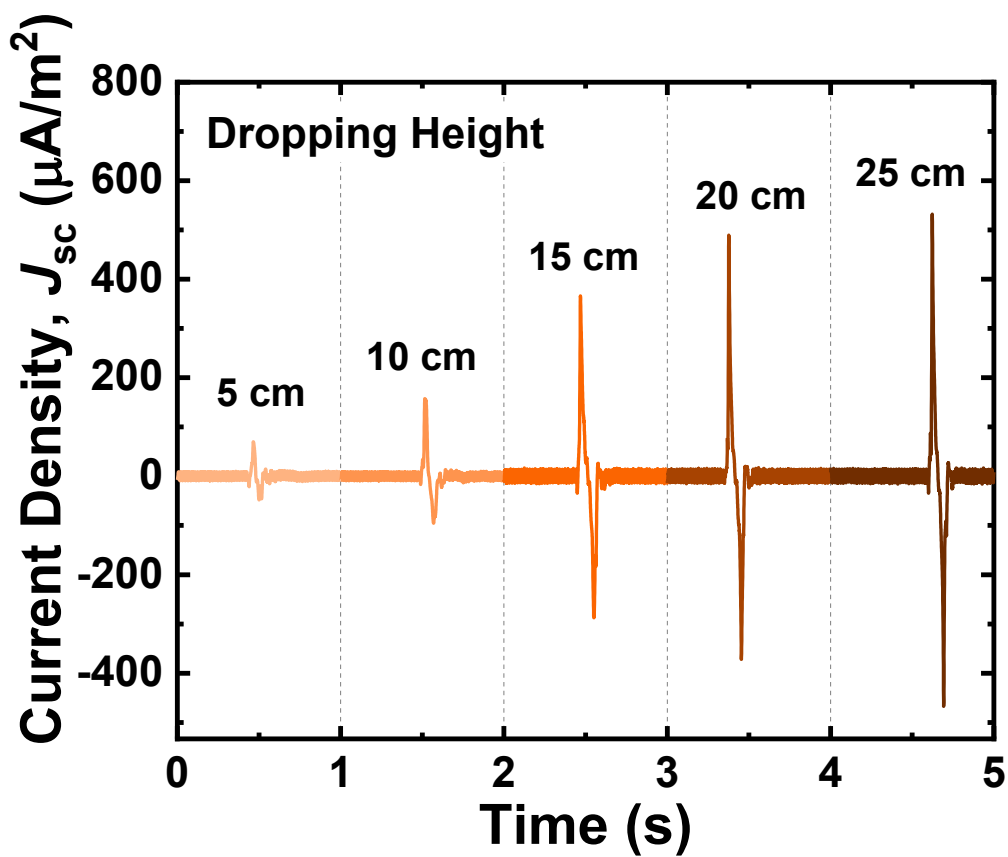

Figure S12. Increased output current density with the increased dropping height ( $h$ ) of the metal ball.

**13. The impact force applied to the STF-TENGs with various STF thicknesses**

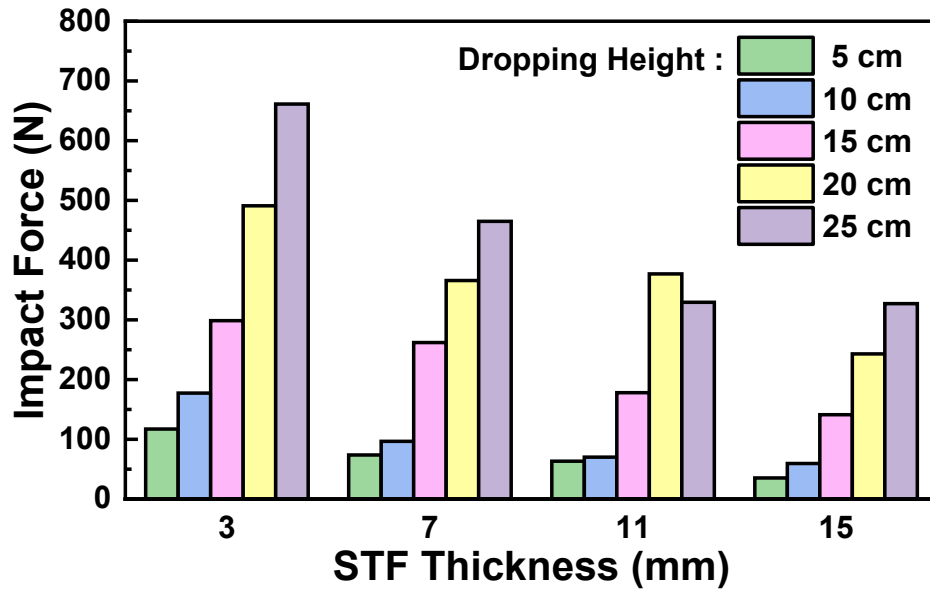

**Figure S13.** Comparison of impact force for various STF thicknesses.

#### 14. Poor mechanical robustness of L-TENG by stabbing

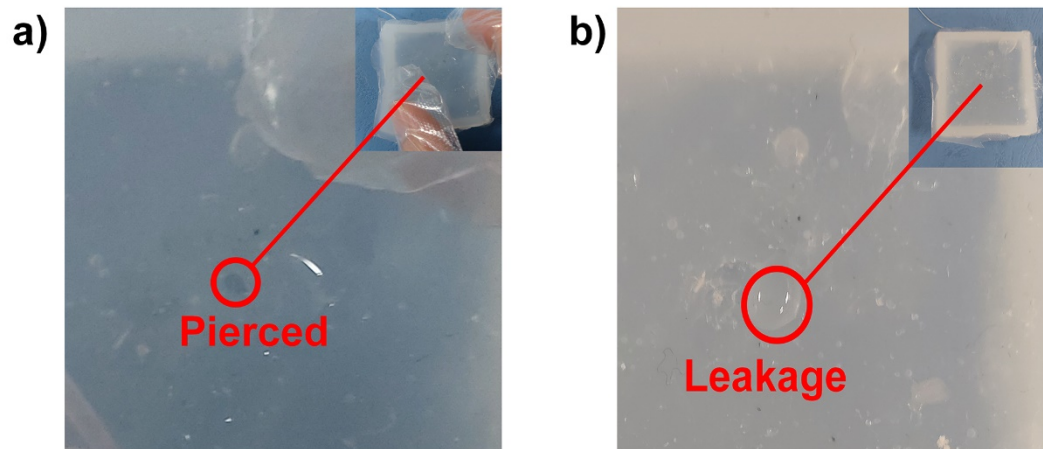

**Figure S14.** Optical photographs of destroyed L-TENG. (a) Pierced outer silicone rubber shell. (b) Water bead formed by leakage *via* the pin hole after 10 times of the stabbing with the pointed gimlet.

## 15. Output current density for 8-types of motion

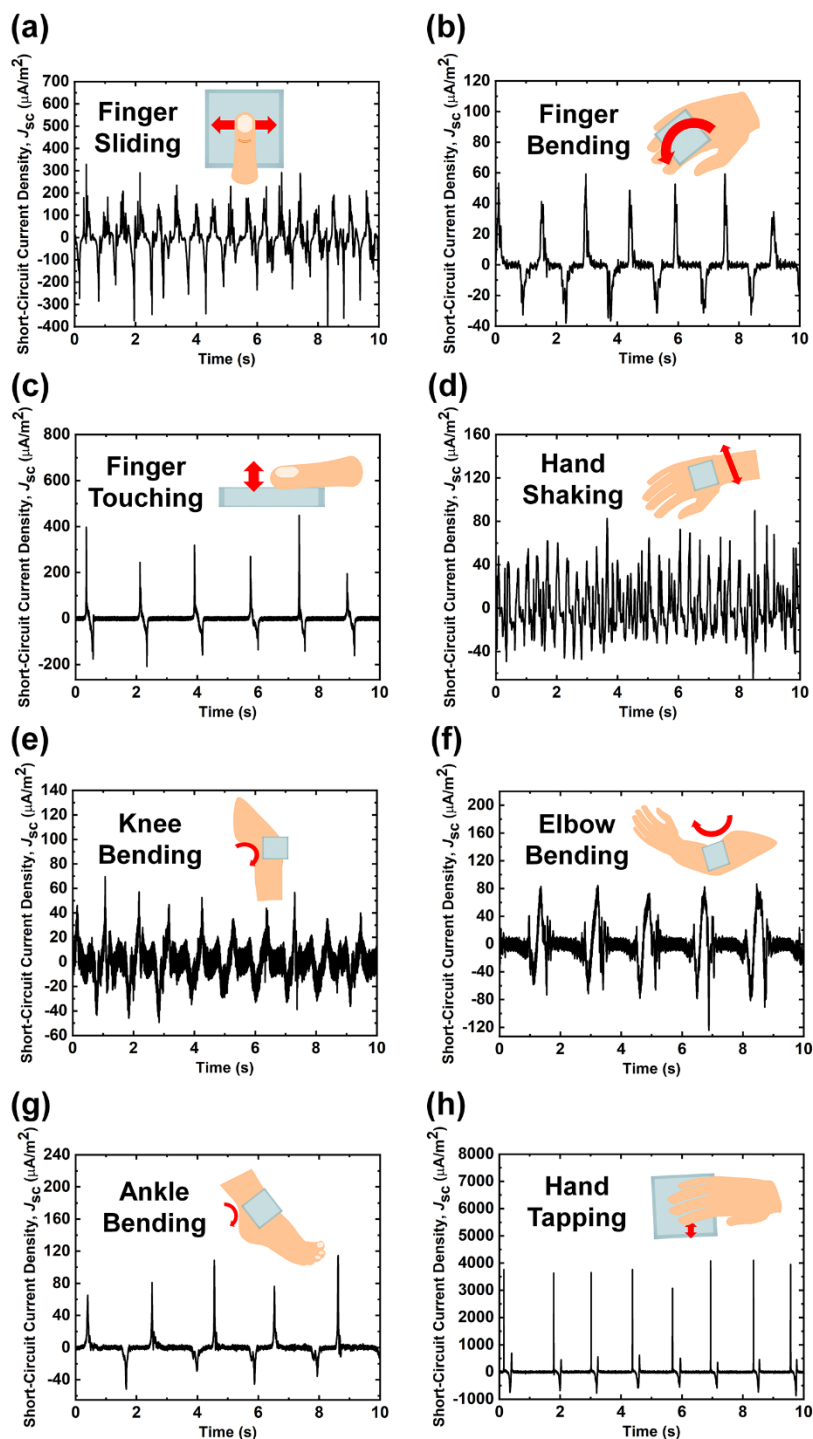

**Figure S15.** Output current density for 8 types of human body motion. (a)  $J_{sc}$  with finger sliding. (b)  $J_{sc}$  with finger bending. (c)  $J_{sc}$  with finger touching. (d)  $J_{sc}$  with hand shaking. (e)  $J_{sc}$  with knee bending. (f)  $J_{sc}$  with elbow bending. (g)  $J_{sc}$  with ankle bending. (h)  $J_{sc}$  with hand tapping.



**Table S1. Different filler materials embedded in S-TENG, L-TENG, and STF-TENG**

|          | Recipe                                         | Schematic                                                                                                                                                                                                                                                                                                                                                                                                                                                                                                                                                                                                                                                                                                                                                                                                                                                                                                                                                                                                                 |
|----------|------------------------------------------------|---------------------------------------------------------------------------------------------------------------------------------------------------------------------------------------------------------------------------------------------------------------------------------------------------------------------------------------------------------------------------------------------------------------------------------------------------------------------------------------------------------------------------------------------------------------------------------------------------------------------------------------------------------------------------------------------------------------------------------------------------------------------------------------------------------------------------------------------------------------------------------------------------------------------------------------------------------------------------------------------------------------------------|
| S-TENG   | CB (9.0 wt %) + Ecoflex                        | <p> <span style="display: inline-block; width: 15px; height: 10px; background-color: black; border: 1px solid black;"></span> CB + Ecoflex<br/> <span style="display: inline-block; width: 15px; height: 10px; background-color: lightblue; border: 1px solid black;"></span> Ecoflex<br/> <span style="display: inline-block; width: 15px; height: 10px; background-color: #d2b48c; border: 1px solid black;"></span> Porcine leather         </p>                                                                                                                                                                                                                                                                                                                                                                                                                                                                                                                                                                       |
| L-TENG   | NaCl (0.36 g/mL) + Water                       | <p> <span style="display: inline-block; width: 15px; height: 10px; background-color: blue; border: 1px solid black;"></span> Water    <span style="display: inline-block; width: 15px; height: 10px; background-color: brown; border: 1px solid black;"></span> Na<sup>+</sup> ion<br/> <span style="display: inline-block; width: 15px; height: 10px; background-color: lightblue; border: 1px solid black;"></span> Ecoflex    <span style="display: inline-block; width: 15px; height: 10px; background-color: orange; border: 1px solid black;"></span> Cl<sup>-</sup> ion<br/> <span style="display: inline-block; width: 15px; height: 10px; background-color: #d2b48c; border: 1px solid black;"></span> Porcine leather         </p>                                                                                                                                                                                                                                                                              |
| STF-TENG | NaCl (0.36 g/mL)<br>+ Water : Starch (45 : 55) | <p> <span style="display: inline-block; width: 15px; height: 10px; background-color: yellow; border: 1px solid black;"></span> STF    <span style="display: inline-block; width: 15px; height: 10px; background-color: blue; border: 1px solid black;"></span> Water<br/> <span style="display: inline-block; width: 15px; height: 10px; background-color: lightblue; border: 1px solid black;"></span> Ecoflex    <span style="display: inline-block; width: 15px; height: 10px; background-color: green; border: 1px solid black;"></span> Corn starch<br/> <span style="display: inline-block; width: 15px; height: 10px; background-color: #d2b48c; border: 1px solid black;"></span> Porcine leather    <span style="display: inline-block; width: 15px; height: 10px; background-color: brown; border: 1px solid black;"></span> Na<sup>+</sup> ion<br/> <span style="display: inline-block; width: 15px; height: 10px; background-color: orange; border: 1px solid black;"></span> Cl<sup>-</sup> ion         </p> |

## Supplementary Note 1. A detailed description of comparing the operations of the S-TENG, the L-TENG, the STF-TENG

As shown in Figure S15, it is assumed that the waveforms of the normalized impact force are the same for fair comparison among the S-TENG, the L-TENG, and the STF-TENG. Additionally, it is also assumed that force at time  $t_3$  corresponds to critical shear rate of the STF. The schematic of different behavior for the S-TENG, the L-TENG, and the STF-TENG are shown in Table S2. For better understanding, all the schematics are exaggerated along with a vertical direction.

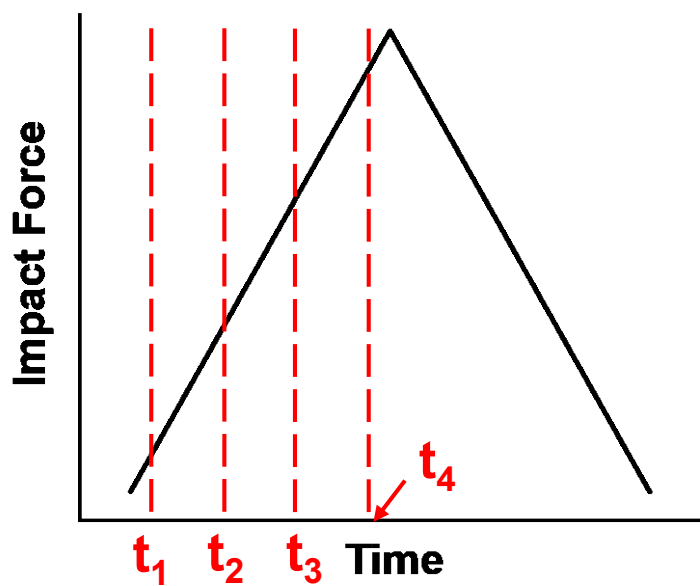

**Figure S16.** Normalized contact force waveform, which is assumed to be the same for the S-TENG, the L-TENG, the STF-TENG

### At $t_1$ :

The porcine leather just touches the silicone rubber for all TENGs. There is no difference.

### At $t_2$ :

Because the solid is relatively hard, the deformation is scarcely occurred in the S-TENG. On the other hand, for both the L-TENG and the STF-TENG, deformation of the flexible silicone rubber results in increasing an effective contact area. The porcine leather snuggles into the deformable silicone rubber by virtue of fluidity.

### At $t_3$ :

The deformation does not occur in the S-TENG so that the porcine leather does not move downward. For the L-TENG, increased contact force is measured when the porcine leather is moved deeply and downwardly. For the STF-TENG, the STF is hardened at the critical shear rate. Nevertheless, the porcine leather tended to be moving deeply and downwardly until the critical shear rate is reached.

**At  $t_4$ :**

The deformation is not occurred in the S-TENG, however, the further deformation is still occurred in the L-TENG. For the STF-TENG, the porcine leather does not move further downwardly owing to the hardened STF.

**Table S2. Schematic of the S-TENG, the L-TENG, the STF-TENG at  $t_1, t_2, t_3,$  and  $t_4$**

|          | $t = t_1$                                                                             | $t = t_2$                                                                           | $t = t_3$                                                                            | $t = t_4$                                                                             |
|----------|---------------------------------------------------------------------------------------|-------------------------------------------------------------------------------------|--------------------------------------------------------------------------------------|---------------------------------------------------------------------------------------|
| S-TENG   |    |  |  |  |
| L-TENG   |    |  |  |  |
| STF-TENG |    |  |  |  |
|          |    |                                                                                     |                                                                                      |                                                                                       |
|          |   |                                                                                     |                                                                                      |                                                                                       |
|          |  |                                                                                     |                                                                                      |                                                                                       |
|          | <b>Porcine leather</b>                                                                | <b>Ecoflex</b>                                                                      | <b>CB + Ecoflex</b>                                                                  | <b>Water</b>                                                                          |
|          |                                                                                       |                                                                                     |                                                                                      | <b>STF</b>                                                                            |
